# Supplementary material for: Investigation of June 2020 Giant Saharan Dust Storm Using Remote Sensing Observations and Model Reanalysis
Source: Preprints.org preprint supplement (doi:10.20944/preprints202107.0100.v1), 2021-07-05
Supplement: Supplementary file 1 [file supplementary]

**Supplementary Figures**

Fig.S1: BSC-DREAM model simulated surface dust concentration (μg/m3) over the dust source region.

Fig S2: Area averaged time series for (a) Dust AOD from MERRA-2 (b) dust AOD from CAMS.

Fig S3: Area averaged Dust column Mass density from MERRA-2(left) and temporal average during the event period (right).

Fig S4: The total attenuated backscatter (km−1 sr−1) and aerosol types over the study region during the dust storm event from CALIPSO observation.
